# Supplementary material for: Validity and reliability of the Patient-Reported Outcomes Measurement Information System (PROMIS®) using computerized adaptive testing in patients with advanced chronic kidney disease
Source: PubMed Central journal article supplement — Nephrol Dial Transplant. 2022 Aug 1;38(5):1158–69. doi: 10.1093/ndt/gfac231 (PMC10157750; doi:10.1093/ndt/gfac231), 2022-08-01
Supplement: gfac231_supplemental_file.pdf [file gfac231_supplemental_file.pdf]

## **SUPPLEMENTAL MATERIAL**

### **Validity and reliability of Patient-Reported Outcomes Measurement Information System (PROMIS®) using Computerized Adaptive Testing (CAT) in patients with advanced chronic kidney disease**

Esmee M. van der Willik, Fenna van Breda, Brigit C. van Jaarsveld, Marlon van de Putte, Isabelle W. Jetten, Friedo W. Dekker, Yvette Meuleman, Frans J. van Ittersum, Caroline B. Terwee

# Supplement A – Visual illustration of Computerized Adaptive Testing (CAT)

## Example Computerized Adaptive Testing (CAT)

using Patient-Reported Outcomes Measurement Information System (PROMIS®)

### Physical Function

To estimate an individual's level of physical function, the CAT starts with the item that has the highest information value for the average level of the general population.

1. Does your health now limit you in doing two hours of physical labor?

"Somewhat"

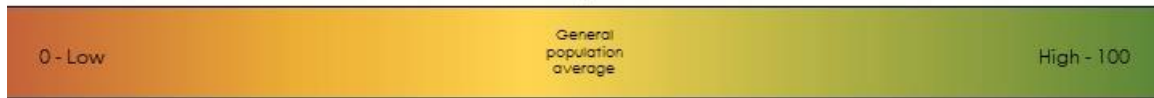

Based on the answer, the individual's level of function is estimated somewhere at the lower side of the scale (the width of the bar indicates the precision), therefore the next question concerns a more 'easy' activity.

2. Are you able to do chores such as vacuuming or yard work?

"With a little difficulty"

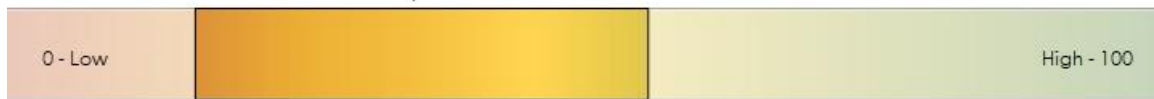

Based on the answer, the individual's level of function is likely a little higher (precision increases) and therefore the next question concerns a slightly more 'difficult' activity.

3. Does your health now limit you in walking more than a mile (1.6 km)?

"Somewhat"

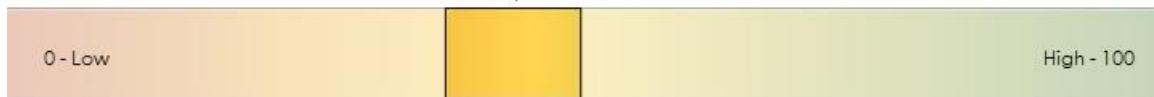

The CAT now reached sufficient precision (SE: 1.8) and the estimated T-score is 43.

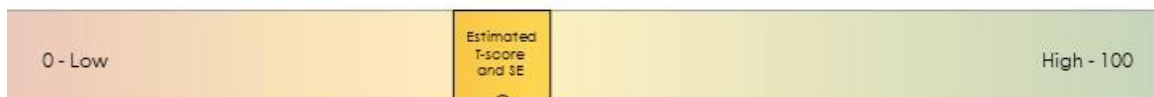

**Figure S1. Visual illustration of Computerized Adaptive Testing (CAT) using Patient-Reported Outcomes Measurement Information System (PROMIS®) Physical Function**

## Supplement B – PROMIS CAT item characteristics

Table S1. Characteristics of items used in PROMIS CATs.

| PROMIS CAT                                                   | Items used / total item bank | Top 3 items used                                                                                                                                                                                                                                                                                                          | Items per patient                                                  |
|--------------------------------------------------------------|------------------------------|---------------------------------------------------------------------------------------------------------------------------------------------------------------------------------------------------------------------------------------------------------------------------------------------------------------------------|--------------------------------------------------------------------|
| <b>Physical Function</b>                                     | 28 / 121                     | <ol style="list-style-type: none"> <li>Does your health now limit you in doing two hours of physical labor? (n=205)</li> <li>Are you able to do chores such as vacuuming or yard work? (n=122)</li> <li>Does your health now limit you in walking more than a mile (1.6 km)? (n=119)</li> </ol>                           | Median (IQR): 4 (3-6)<br>Min-max: 3-12<br>12 items: n=8 (3.9%)     |
| <b>Pain Interference</b>                                     | 24 / 40                      | <ol style="list-style-type: none"> <li>How much did pain interfere with your day to day activities? (n=203)</li> <li>How much did pain interfere with your ability to participate in social activities? (n=109)</li> <li>How often was pain distressing to you? (n=95)</li> </ol>                                         | Median (IQR): 4 (2-12)<br>Min-max: 2-12<br>12 items: n=75 (36.9%)  |
| <b>Fatigue</b>                                               | 27 / 95                      | <ol style="list-style-type: none"> <li>How often did you have to push yourself to get things done because of your fatigue? (n=203)</li> <li>I have trouble starting things because I am tired. (n=180)</li> <li>How exhausted were you on average? (n=33)</li> </ol>                                                      | Median (IQR): 5 (4-6)<br>Min-max: 4-12<br>12 items: n=6 (3.0%)     |
| <b>Sleep Disturbance</b>                                     | 22 / 27                      | <ol style="list-style-type: none"> <li>My sleep quality was... (n=203)</li> <li>I had trouble sleeping. (n=203)</li> <li>I had a problem with my sleep. (n=201)</li> </ol>                                                                                                                                                | Median (IQR): 10 (8-12)<br>Min-max: 6-12<br>12 items: n=71 (35.0%) |
| <b>Anxiety</b>                                               | 21 / 29                      | <ol style="list-style-type: none"> <li>I felt uneasy... (n=203)</li> <li>I felt tense... (n=157)</li> <li>I felt anxious and worried... (n=142)</li> </ol>                                                                                                                                                                | Median (IQR): 7 (6-10)<br>Min-max: 5-12<br>12 items: n=44 (21.7%)  |
| <b>Depression</b>                                            | 21 / 28                      | <ol style="list-style-type: none"> <li>I felt depressed. (n=204)</li> <li>I felt unhappy. (n=144)</li> <li>I felt discouraged about the future. (n=130)</li> </ol>                                                                                                                                                        | Median (IQR): 8 (5-12)<br>Min-max: 3-12<br>12 items: n=55 (27.0%)  |
| <b>Ability to Participate in Social Roles and Activities</b> | 23 / 35                      | <ol style="list-style-type: none"> <li>I have trouble doing all of my regular leisure activities with others ... (n=203)</li> <li>I have trouble doing all of the activities with friends that I want to do... (n=132)</li> <li>I have trouble doing all of the family activities that I want to do... (n=114)</li> </ol> | Median (IQR): 5 (4-6)<br>Min-max: 3-12<br>12 items: n=13 (6.4%)    |
